# Supplementary material
Source: publisher figshare collection journal article supplement (https://karger.figshare.com/ndownloader/files/27907794)
Supplement: Supplementary file 1 [file 27907794]

**SUPPLEMENTAL MATERIALS**

Supplementary Table 1: Baseline demographics and clinical characteristics of patients who died before follow up, compared to those survived till follow up.

|  | **Survived till follow up**  **(n = 125)** | **Died before follow up**  **(n = 142)** | **P value** |
| --- | --- | --- | --- |
| Age | 55.69 ± 11.75 | 65.17 ± 10.59 | p < 0.001 a |
| Male | 56 (44.8%) | 83 (58.5%) | p = 0.001 b |
| Primary Diagnosis  HT DM GN  PKD  Urology Others  Unknown | 18 (14.4%)  22 (17.6%)  60 (48.0%)  3 (2.4%)  4 (3.2%)  3 (2.4%)  18 (14.4%) | 12 (8.5%)  76 (53.5%)  24 (16.9%)  5 (3.5%)  7 (4.9%)  3 (2.1%)  12 (8.5%) | p < 0.001 b |
| Dialysis Duration (months) | 46.35 ± 54.24 | 46.99 ± 48.43 | p = 0.9 a |
| Residual GFR (ml/min/1.73m2) | 1.68 ± 2.19 | 1.25 ± 1.79 | p = 0.08 a |
| **Nutritional state** | | | |
| CCI | 4.40 ± 1.88 | 6.22 ± 2.15 | p < 0.001 a |
| SGA | 5.28 ± 0.88 | 5.01 ± 0.94 | p = 0.02 a |
| MIS | 7.07 ± 3.55 | 8.25 ± 3.45 | p = 0.009 a |
| Albumin (g/L) | 34.86 ± 3.98 | 32.66 ± 4.45 | p < 0.001 a |
| **Anthropometric measurement** | | | |
| Weight (kg) | 61.91 ± 11.89 | 67.56 ± 13.36 | p < 0.001 a |
| Height (cm) | 159.33 ± 8.00 | 160.87 ± 7.59 | p = 0.1 a |
| Waist (cm) | 89.98 ± 11.45 | 96.44 ± 10.55 | p < 0.001 a |
| Hip (cm) | 94.51 ± 10.25 | 98.81 ± 10.32 | p = 0.001 a |
| BMI (kg/m2) | 24.32 ± 4.04 | 26.03 ± 4.41 | p = 0.001 a |
| WHR | 0.96 ± 0.11 | 0.98 ± 0.07 | p = 0.04 a |
| Frailty score | 7.57 ± 4.16 | 9.76 ± 4.99 | p = 0.001 a |
| PHQ-9 score | 6.88 ± 5.61 | 7.32 ± 5.74 | p = 0.5 a |
| **Peritoneal transport characteristics** | | | |
| D/P4 | 0.64 ±0.13 | 0.65 ± 0.12 | p = 0.5 a |
| MTAC (ml/min/1.73m2) | 9.67 ± 4.18 | 9.72 ± 4.71 | p = 0.9 a |
| NPNA (g/kg/day) | 1.10 ±.30 | 1.02 ± 0.23 | p = 0.01 a |
| FEBM (%) | 52.86 ± 13.25 | 50.84 ± 13.06 | p = 0.2 a |
| **Pulse wave velocity (cm/sec)** | | | |
| CF-PWV | 80.08 ± 253.71 | 153.60 ± 347.84 | p = 0.05 a |
| CR-PWV | 80.02 ± 253.73 | 152.55 ± 348.27 | p = 0.055 a |

DM, diabetes mellitus; GN, glomerulonephritis; PKD, polycystic kidney disease; D/P4, dialysate-to-plasma creatinine concentration at 4th hour; MTAC, mass transfer area coefficient; HT, hypertension; NPNA, normalized protein nitrogen appearance; FEBM, fat-free oedema-free body mass, CF-PWV, carotid-femoral pulse wave velocity; CR-PWV, carotid-radial pulse wave velocity.

Data were compared by aStudent’s t-test, or bChi square test.

Supplementary Table 2: Comparison of demographics and clinical characteristics of patients who remained on PD and those who had changed their modality of renal replacement therapy.

|  | **Remained on PD**  **(n = 94)** | | **Converted to HD**  **(n = 10)** | | **Transplanted**  **(n = 15)** | | **P value** | |
| --- | --- | --- | --- | --- | --- | --- | --- | --- |
|  | Baseline | Follow up | Baseline | Follow up | Baseline | Follow up | Baseline | Follow up |
| Age | 58.11 ± 10.48 |  | 42.80 ± 10.38 |  | 48.00 ± 13.43 |  | p < 0.001 |  |
| Male | 34 (35.8%) |  | 4 (40.0%) |  | 5 (33.3%) |  | p = 0.9 |  |
| Dialysis vintage (months) | 45.13 ± 44.58 |  | 64.97 ± 69.16 |  | 48.71 ± 47.79 |  | p = 0.6 |  |
| **Anthropometric measurements** | | | | | | | | |
| Weight (kg) | 61.11 ± 11.63 | 58.94 ± 11.73 | 69.82 ± 15.83 | 65.20 ± 18.56 | 59.65 ± 9.29 | 58.98 ± 8.68 | p = 0.07 | p = 0.3 |
| Height (cm) | 158.31 ± 7.83 | 158.11 ± 7.84 | 163.20 ± 8.00 | 162.80 ± 8.53 | 161.80 ± 8.56 | 161.20 ± 8.53 | p = 0.07 | p = 0.1 |
| Waist (cm) | 90.12 ± 11.72 | 91.14 ± 11.03 | 93.25 ± 14.07 | 89.70 ± 12.38 | 85.87 ± 7.39 | 82.93 ± 7.81 | p = 0.3 | p = 0.03 |
| Hip (cm) | 94.43 ± 10.58 | 93.96 ± 10.14 | 100.93 ± 12.56 | 93.80 ± 10.12 | 91.87 ± 6.17 | 93.20 ± 4.35 | p = 0.09 | p = 0.9 |
| BMI | 24.32 ± 4.04 | 24.64 ± 4.14 | 26.24 ± 5.87 | 24.64 ± 7.38 | 22.68 ± 2.23 | 22.62 ±1.93 | p = 0.1 | p = 0.5 |
| WHR | 0.958 ± 0.119 | 0.971 ± 0.077 | 0.922 ± 0.058 | 0.954 ± 0.520 | 0.935 ± 0.559 | 0.891 ± 0.081 | p = 0.5 | p = 0.001 |
| **Body composition** | | | | | | | | |
| OH | 2.55 ± 2.93 | 2.87 ± 2.15 | 2.94 ± 2.75 | 3.50 | 2.57 ± 2.32 | 4.20 | p = 0.09 | p = 0.8 |
| E/I ratio | 0.95 ± 0.17 | 0.94 ± 1.01 | 0.94 ± 0.13 | 0.92 | 0.90 ± 0.15 | 1.11 | p = 0.5 | p = 0.4 |
| LTM | 35.27 ± 9.44 | 39.68 ± 7.79 | 40.22 ± 8.59 | 40.90 | 39.69 ± 10.74 | 30.80 | p = 0.1 | p = 0.6 |
| ATM | 21.35 ± 10.84 | 24.52 ± 8.60 | 26.66 ± 17.59 | 7.20 | 16.07 ± 9.39 | 24.40 | p = 0.07 | p = 0.2 |
| **Nutritional state** | | | | | | | | |
| SGA | 5.23 ± 0.89 | 5.35 ± 1.46 | 5.60 ± 0.52 | 5.20 ± 1.99 | 5.33 ± 1.05 | 6.43 ± 0.65 | p = 0.4 | p = 0.031 |
| MIS | 7.22 ± 3.66 | 13.31 ± 4.70 | 6.56 ± 3.12 | 12.20 ± 6.07 | 6.93 ± 3.01 | 6.36 ± 1.95 | p = 0.8 | p < 0.001 |
| Albumin | 34.82 ± 3.79 | 25.66 ± 5.13 | 34.68 ± 4.75 | 29.76 ± 5.05 | 36.42 ± 4.21 | 38.33 ± 3.16 | p = 0.4 | p < 0.001 |
|  |  | | | | | | | |
| CCI | 4.49 ± 1.76 | 6.09 ± 2.72 | 3.50 ± 1.84 | 3.90 ± 1.79 | 3.60 ± 1.40 | 4.07 ± 1.77 | p = 0.06 | p = 0.003 |
| Frailty score | 7.85 ± 4.55 | 12.77 ± 7.49 | 7.50 ± 2.95 | 7.80 ± 4.32 | 6.53 ± 2.42 | 6.93 ± 3.63 | p = 0.5 | p = 0.003 |
| PHQ-9 score | 6.98 ± 5.77 | 11.66 ± 7.25 | 7.20 ± 6.22 | 6.40 ± 5.91 | 7.40 ± 4.94 | 5.21 ± 3.97 | p = 0.9 | p = 0.01 |

PD, peritoneal dialysis; HD, hemodialysis; BMI, body mass index; WHR, waist hip ratio; OH, overhydration; E/I ratio, ratio of extracellular water to intracellular water; LTM, lean tissue mass; ATM, adipose tissue mass; SGA, subjective global assessment; MIS, comprehensive malnutrition inflammation score; CCI, Charlson Comorbidity Index.
All data were compared by one-way analysis of variance (ANOVA).

Supplementary Table 3: Serial measurements of nutritional state, body composition and depressive state of the patients who remained on PD, between subjects with deteriorating frailty, and stable or improving frailty.

|  | **Deteriorating frailty**  **(n = 60)** | | **Stable or improving frailty**  **(n = 34)** | | **P-value** | |
| --- | --- | --- | --- | --- | --- | --- |
|  | Baseline | Follow up | Baseline | Follow up | Baseline | Follow up |
| Total Kt/V | 1.93 ± 0.57 | 1.70 ± 0.39 | 2.07 ± 0.40 | 1.86 ± 0.38 | p = 0.3 | p = 0.1 |
| Peritoneal Kt/V | 1.53 ± 0.34 | 1.62 ± 0.39 | 1.63 ± 0.24 | 1.75 ± 0.34 | p = 0.2 | p = 0.2 |
| Residual GFR (ml/min/1.73m2) | 1.90 ± 2.37 | 0.36 ± 0.94 | 1.82 ± 2.07 | 0.44 ± 0.83 | p = 0.9* | p = 0.7* |
| **Nutritional state:** |  | | | | | |
| CCI | 4.61 ± 1.78 | 6.33 ± 2.89 | 4.10 ± 1.64 | 5.19 ± 1.86 | p = 0.2 | p = 0.09 |
| SGA | 5.19 ± 0.84 | 5.08 ± 1.44 | 5.38 ± 1.07 | 6.38 ± 0.97 | p = 0.4 | p < 0.001 |
| MIS | 7.35 ± 3.58 | 14.21 ± 4.57 | 6.74 ± 4.00 | 10.71 ± 3.77 | p = 0.5 | p = 0.002 |
| Albumin (g/L) | 34.69 ± 4.03 | 25.86 ± 4.90 | 35.24 ± 2.86 | 24.78 ± 5.91 | p = 0.6 | p = 0.4 |
| **Anthrompometric measurement:** |  | | | | | |
| Weight (kg) | 61.87 ± 11.89 | 59.02 ± 12.16 | 58.44 ± 7.95 | 58.60 ± 9.97 | p = 0.2 | p = 0.9 |
| Height (cm) | 158.41 ± 7.95 | 158.26 ± 8.12 | 157.95 ± 7.57 | 156.48 ± 6.81 | p = 0.8 | p = 0.4 |
| Waist (cm) | 91.38 ± 11.94 | 91.71 ± 8.85 | 85.66 ± 9.95 | 89.10 ± 8.85 | p = 0.05 | p = 0.4 |
| Hip (cm) | 95.44 ± 10.60 | 93.79 ±10.73 | 90.86 ± 9.96 | 94.55 ± 7.90 | p = 0.08 | p = 0.8 |
| BMI (kg/m2) | 24.57 ± 3.99 | 23.48 ± 4.10 | 23.46 ± 4.16 | 24.02 ± 4.37 | p = 0.3 | p = 0.6 |
| WHR | 0.96 ± 0.10 | 0.98 ±.08 | 0.95 ± 0.16 | 0.94 ± 0.04 | p = 0.8 | p = 0.06 |
| **Body composition** |  | | | | | |
| OH (Litre) | 2.68 ± 3.20 | 3.00 ± 2.36 | 2.09 ± 1.64 | 2.40 ± 1.84 | p = 0.4 | p = 0.8 |
| E/I ratio | 0.96 ± 0.18 | 0.94 ± 0.12 | 0.92 ± 0.14 | 0.92 ± 0.04 | p = 0.4 | p = 0.8 |
| LTM (kg) | 35.78 ± 10.00 | 40.19 ± 6.55 | 33.44 ± 7.02 | 37.90 ± 14.84 | p = 0.3 | p = 0.7 |
| ATM (kg) | 21.36 ± 11.35 | 24.94 ± 9.56 | 21.32 ± 9.04 | 23.05 ± 6.15 | p = 0.9 | p = 0.8 |
| PHQ-9 score | 6.96 ± 5.72 | 11.25 ± 6.60 | 7.05 ± 6.08 | 6.19 ± 5.27 | p = 0.9 | p = 0.002 |

PD, peritoneal dialysis; GFR, glomerular filtration rate; CCI, Charlson Comorbidity Index; SGA, subjective global assessment; MIS, comprehensive malnutrition inflammation score; BMI, body mass index; WHR, waist hip ratio; OH, overhydration; E/I ratio, ratio of extracellular water to intracellular water; LTM, lean tissue mass; ATM, adipose tissue mass.

Data were compared by Student’s t-test or *Mann-Whitney U test
